# Supplementary material for: Thermal atomic layer deposition of gold nanoparticles: controlled growth and size selection for photocatalysis
Source: Royal Society of Chemistry journal article supplement (doi:10.1039/d0nr01092h), 2020-01-01
Supplement: d0nr01092h1.pdf [file d0nr01092h1.pdf]

## Supporting Information

# Thermal Atomic Layer Deposition of Gold Nanoparticles: Controlled Growth and Size Selection for Photocatalysis

Fatemeh S. M. Hashemi <sup>\*[a]</sup>, Fabio Grillo <sup>[a]</sup>, Vikram R. Ravikumar <sup>[a]</sup>, Dominik Benz <sup>[a]</sup>, Ankit Shekhar <sup>[a]</sup>, Matthew B. E. Griffiths <sup>[b]</sup>, Seán T. Barry <sup>[b]</sup> and J. Ruud van Ommen <sup>[b]</sup>

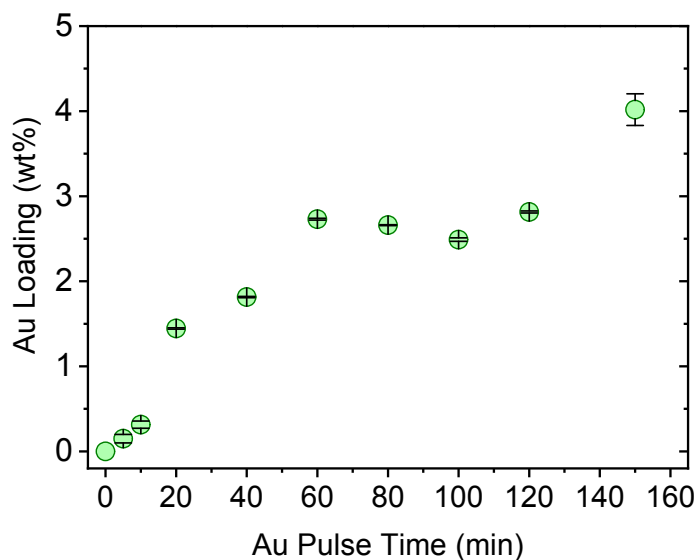

Supporting Info Figure 1: ICP measurements, Au loading on TiO<sub>2</sub> nanoparticles as a function of Au precursor exposure time for 1 ALD cycle

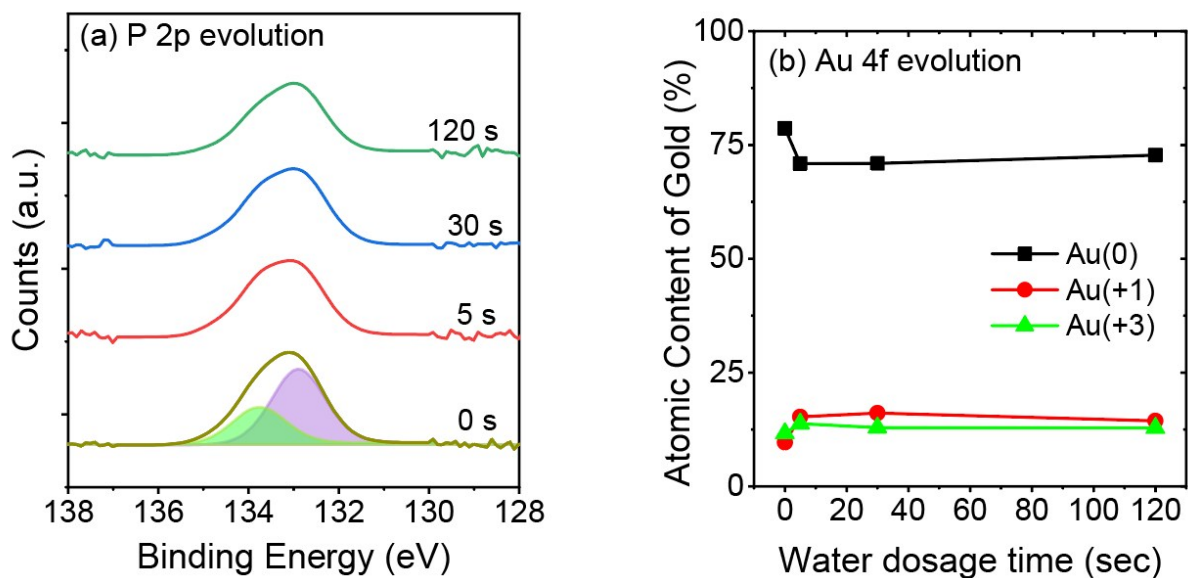

Supporting Info Figure 2: effects of increasing water dosage time on the P and Au composition of the nanoparticles. (a) XPS evolution of P2p peak (purple: high binding energy peak, green: low binding energy peak) (b) XPS evolution of Au 4f oxidation states

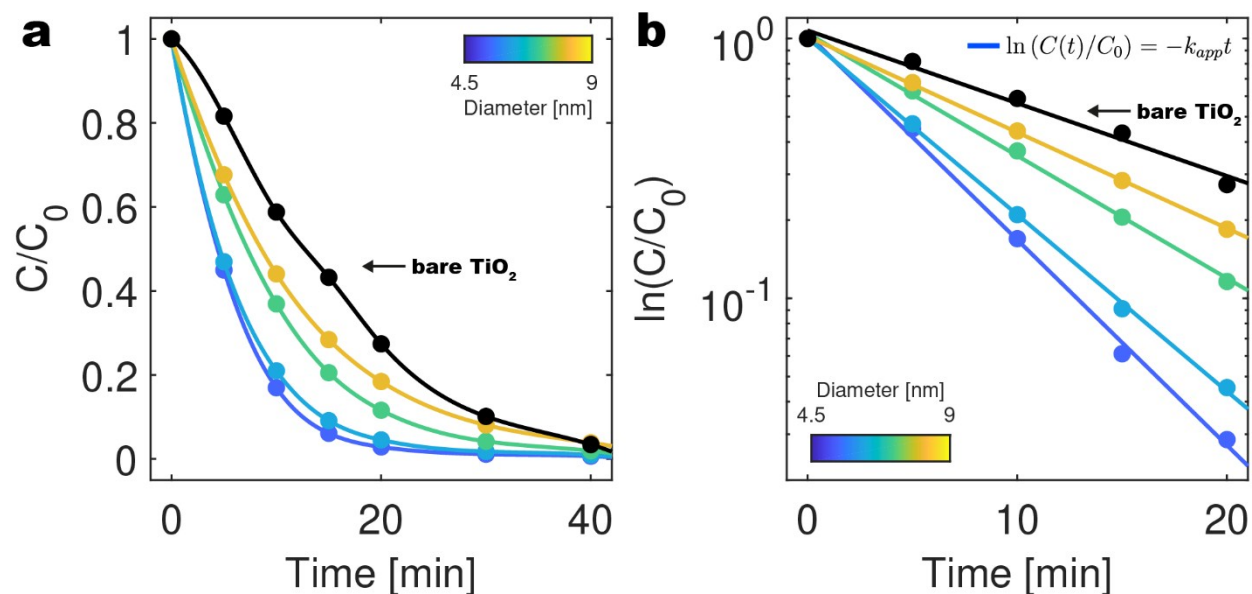

Supporting Info Figure 3: Changes in the concentration of RhB solution containing the  $TiO_2$  and Au/ $TiO_2$  nanoparticles as the Au nanoparticle size increases (a)  $C/C_0$  versus illumination time (b)  $\ln(C/C_0)$  versus illumination time. The reported  $k_{app}$  value for each sample is calculated from the slope of each curve in this graph.
